# Supplementary material
Source: HighWire-hosted journal article supplement (http://www.qdcxjkg.com/highwire/filestream/126480/field_highwire_adjunct_files/3/supplementary_material.pdf)
Supplement: supplementary_material.pdf [file supplementary_material.pdf]

**S1: Search terms per database, based on participants, exposure and outcomes.**

| Database                                                                  | What             | Participants                                                                                                                                        | Exposure                                                                                                                                                                                                                                                                                                                                                                                                                                                                                                                                                                                                                                                 | Outcome                                                                                                                                                                                                                                                                        |
|---------------------------------------------------------------------------|------------------|-----------------------------------------------------------------------------------------------------------------------------------------------------|----------------------------------------------------------------------------------------------------------------------------------------------------------------------------------------------------------------------------------------------------------------------------------------------------------------------------------------------------------------------------------------------------------------------------------------------------------------------------------------------------------------------------------------------------------------------------------------------------------------------------------------------------------|--------------------------------------------------------------------------------------------------------------------------------------------------------------------------------------------------------------------------------------------------------------------------------|
| PubMed                                                                    | MeSH terms       | <ul style="list-style-type: none"> <li>- pregnancy</li> <li>- pregnant women</li> <li>- maternal exposure</li> </ul>                                | <ul style="list-style-type: none"> <li>- stress, psychological</li> <li>- adaptation, psychological</li> <li>- emotions</li> <li>- depression</li> <li>- social adjustment</li> <li>- quality of life</li> <li>- life style</li> <li>- mental health</li> <li>- anxiety</li> <li>- mental disorders</li> <li>- social behavior</li> <li>- socioeconomic factors</li> <li>- social support</li> </ul>                                                                                                                                                                                                                                                     | <ul style="list-style-type: none"> <li>- respiratory sounds</li> <li>- asthma</li> <li>- bronchial hyperreactivity</li> </ul>                                                                                                                                                  |
| EMBASE                                                                    | Subject Headings | <ul style="list-style-type: none"> <li>- pregnancy</li> <li>- pregnant woman</li> </ul>                                                             | <ul style="list-style-type: none"> <li>- mental stress</li> <li>- quality of life</li> <li>- adaptive behavior</li> <li>- coping behavior</li> <li>- social support</li> <li>- adaptation</li> <li>- depression</li> <li>- emotion</li> <li>- social adaptation</li> <li>- quality of life</li> <li>- lifestyle</li> <li>- family violence</li> <li>- domestic violence</li> <li>- violence</li> <li>- partner violence</li> <li>- mental health</li> <li>- psychological well being</li> <li>- anxiety</li> <li>- mental disease</li> <li>- social behavior</li> <li>- socioeconomics</li> <li>- social support</li> </ul>                              | <ul style="list-style-type: none"> <li>- wheezing</li> <li>- abnormal respiratory sound</li> <li>- asthma</li> <li>- allergic asthma</li> <li>- exercise induced asthma</li> <li>- extrinsic asthma</li> <li>- intrinsic asthma</li> <li>- bronchus hyperreactivity</li> </ul> |
| PsycINFO                                                                  | Subject Headings | <ul style="list-style-type: none"> <li>- prenatal care</li> <li>- pregnancy</li> <li>- prenatal development</li> <li>- prenatal exposure</li> </ul> | <ul style="list-style-type: none"> <li>- psychological stress</li> <li>- stress</li> <li>- chronic stress</li> <li>- emotional adjustment</li> <li>- emotional control</li> <li>- coping behavior</li> <li>- emotions</li> <li>- mental disorders</li> <li>- mental health</li> <li>- psychopathology</li> <li>- depression (emotion)</li> <li>- social adjustment</li> <li>- quality of life</li> <li>- lifestyle</li> <li>- domestic violence</li> <li>- anxiety</li> <li>- emotional states</li> <li>- social behavior</li> <li>- antisocial behavior</li> <li>- socioeconomic status</li> <li>- social support</li> <li>- social networks</li> </ul> | <ul style="list-style-type: none"> <li>- asthma</li> </ul>                                                                                                                                                                                                                     |
| Free text terms, all databases (PubMed, EMBASE, PsycINFO, Web of Science) | Title, abstract  | <ul style="list-style-type: none"> <li>- pregnan*</li> <li>- prenatal*</li> <li>- maternal exposure</li> <li>- gestation</li> </ul>                 | <p>life stress, mental suffering, environmental stress, coping*, socia*, socio*, psychol*, psychos*, psycho-s*, psychi*, emotion*, distress*, depress*, mental*, adjustment*, Anxieties, anxiety*, anxious*, affect*, fear*, behavior*, behaviour*, Lifestyle*, quality of life, abuse*, domestic violence*, life style*, life events, housing issues, socioeconomic status*, trauma*, adapt*</p>                                                                                                                                                                                                                                                        | <ul style="list-style-type: none"> <li>- respiratory sound*</li> <li>- wheez*</li> <li>- asthma*</li> <li>- bronchial hyperreactivit*</li> <li>- airway hyperresponsiveness</li> <li>- bronchial hyperresponsiveness</li> </ul>                                                |

## S2

### NEWCASTLE - OTTAWA QUALITY ASSESSMENT SCALE – adapted version

#### COHORT STUDIES

Note: A study can be awarded a maximum of one star for each numbered item within the Selection and Outcome categories. A maximum of two stars can be given for Comparability.

#### Selection (Max. 4 stars)

- 1a) Representativeness of the exposed cohort: Is the sample population, pregnant women, representative for the general population of pregnant women?
  - a) truly representative sample of general population of pregnant women \*(general population, no pre-selection on front, clear description in-/exclusion criteria,)
  - b) selected group
  - c) no description
  
- 1b) Representativeness of included population: Are the finally included pregnant women (response rate) representative for the selected sample of pregnant women?
  - a) response rate (intention to analyze/ initial invited) at least 60%
  - b) response rate < 60%
  - c) no description
  
- 2) Ascertainment of exposure (assessment of psychological stress, e.g. anxiety/ depression).
  - a) secure record, validated questionnaires\* (for answering the research question)
  - b) structured interview by an expert \* (Interview by an expert, e.g. psychologist)
  - c) Self report (stress as described by own observations)
  - d) no description
  
- 3) Measurement:
  - a) Prospective\* (questions about psychological stress during pregnancy, measured during pregnancy (max. questions about past 6 months))
  - b) Retrospective- (questions about psychological stress during pregnancy, measured after pregnancy)
  - c) no description

#### Comparability (Max. 2 stars)

- 1) Comparability of cohorts on the basis of the design or analysis (authors checked if confounders are 'true confounders')). Maximum of 2 stars:
  - a) study controls for prenatal maternal smoking \*
  - b) study controls for at least two of the following additional factors: medication/ drug/ alcohol use during pregnancy/ family history of asthma (including maternal and paternal asthma) or illnesses/ environmental tobacco smoke/ birth weight/ cesarean section/ pregnancy duration/ paracetamol use during pregnancy\*
  - c) not controlled for any confounders

#### Outcome (Max 2 stars)

- 1) Assessment of outcome (wheezing/ asthma)
  - a) in case of asthma independent blind assessment (Doctors diagnosed asthma > 6 year) OR in case of wheezing (or respiratory problems): record linkage as reported by a health care professional (number of episodes, duration episode of: wheezing, coughing, fever)\*
  - b) assessment with validated questionnaires (e.g. ISAAC)\*
  - c) as reported by parents (observations, no validated questionnaires)

- d) no description of diagnostics
- 2) Adequacy of follow up of cohorts (percentage of lost subjects after delivery)
- a) complete follow up - all subjects accounted for \*
  - b) subjects lost to follow up unlikely to introduce bias - small number lost - > 80% (select an adequate %) follow up, or description provided of those lost) \*
  - c) follow up rate < 80% (select an adequate %) and no description of those lost
  - d) no statement

## **NEWCASTLE - OTTAWA QUALITY ASSESSMENT SCALE - adapted version**

### **CASE CONTROL STUDIES**

Note: A study can be awarded a maximum of one star for each numbered item within the Selection and Outcome categories. A maximum of two stars can be given for Comparability.

#### **Selection (Max. 4 stars)**

- 1) Is the case definition adequate? (description of asthma/ wheeze)
  - a) in case of asthma independent blind assessment (Doctors diagnosed asthma > 6 year) OR in case of wheezing (or respiratory problems): record linkage as reported by a health care professional (number of episodes, duration episode of: wheezing, coughing, fever)\*
  - b) assessment with validated questionnaires (e.g. ISAAC)\*
  - c) as reported by parents (observations, no validated questionnaires)
  - d) no description of diagnostics
- 2) Representativeness of the cases
  - a) consecutive or obviously representative series of cases\* (all eligible cases, no preselection)
  - b) potential for selection biases or not stated
- 3) Selection of Controls
  - a) community controls \* (same community as cases)
  - b) hospital controls
  - c) no description
- 4) Definition of Controls
  - a) no history of disease (endpoint) \*
  - b) no description of source

#### **Comparability (Max. 2 stars)**

- 1) Comparability of cohorts on the basis of the design or analysis (authors checked if confounders are 'true confounders'). Maximum of 2 stars:
  - a) study controls for prenatal maternal smoking \*
  - b) study controls for at least two of the following additional factors: medication/ drug/ alcohol use during pregnancy/ family history of asthma (including maternal and paternal asthma) or illnesses/ environmental tobacco smoke/ birth weight/ cesarean section/ pregnancy duration/ paracetamol use during pregnancy\*
  - c) not controlled for any confounders

#### **Exposure (Max. 3 stars)**

- 1) Ascertainment of exposure (assessment of psychological stress, e.g. anxiety/ depression).

- a) secure record, validated questionnaires\* (for answering the research question)
- b) structured interview by an expert \* (Interview by an expert, e.g. psychologist)
- c) Self report (stress as described by own observations)
- d) no description

2) Measurement

- a) Prospective\* (questions about psychological stress during pregnancy, measured during pregnancy (max. questions about past 3 months))
- b) Retrospective- (questions about psychological stress during pregnancy, measured after pregnancy)

3) Non-Response rate

- a) same rate for both groups \*
- b) non respondents described
- c) rate different and no designation

**S3: Quality assessment of the studies included in the meta-analysis.**

| Cohort studies                      | Selection (4*)                       |                                               |                              |                | Comparability (2*) | Outcome (2*)             |                                     | Overall quality rating (8) | Quality  |
|-------------------------------------|--------------------------------------|-----------------------------------------------|------------------------------|----------------|--------------------|--------------------------|-------------------------------------|----------------------------|----------|
|                                     | 1a. Representativeness of the cohort | 1b. Representativeness of included population | 2. Ascertainment of exposure | 3. Measurement |                    | 1. Assessment of outcome | 2. Adequacy of follow up of cohorts |                            |          |
| Alton et al. (2013)                 | a)*                                  | a)-                                           | a)*                          | a)*            | a) *<br>b) *       | a)*                      | c)-                                 | 6                          | Moderate |
| Beijers et al. (2010)               | b)-                                  | c)-                                           | a)*                          | a)*            | a) *<br>b) *       | c)-                      | b)*                                 | 5                          | Moderate |
| Chiu et al. (2012)                  | a)*                                  | a)*                                           | a)*                          | a)*            | a) *<br>b) *       | b)*                      | c)-                                 | 7                          | High     |
| Cookson et al. (2009)               | a)*                                  | b)-                                           | a)*                          | a)*            | a) *<br>b) *       | a)*                      | b)*                                 | 7                          | High     |
| De Marco et al. (2012) <sup>a</sup> | a)*                                  | a)*                                           | c)-                          | b)-            | a)-<br>b)*         | b)*                      | b)*                                 | 5                          | Moderate |
| Guxens et al. (2014)                | a)*                                  | a)*                                           | a)*                          | a)*            | a) *<br>b) *       | a)*                      | c)-                                 | 7                          | High     |
| Khashan, et al. (2012)              | a)*                                  | a)*                                           | a)*                          | a)*            | a) *<br>b) *       | d)-                      | c)-                                 | 6                          | Moderate |
| Reyes et al. (2011)                 | b)-                                  | c)-                                           | a)*                          | a)*            | a) *<br>b) *       | c)-                      | b)*                                 | 5                          | Moderate |
| Wood et al. (2011)                  | b)-                                  | a)*                                           | a)*                          | a)*            | a)-<br>b)-         | a)*                      | b)*                                 | 5                          | Moderate |

<sup>a</sup>This study is a survey study. However, quality assessment was scored in the format of cohort studies since this best fitted the study design.

| Case-control studies  | Selection (4*)              |                             |                       |                        | Comparability (2*) | Outcome (3*)                |                |                      | Overall quality rating (9) | Quality  |
|-----------------------|-----------------------------|-----------------------------|-----------------------|------------------------|--------------------|-----------------------------|----------------|----------------------|----------------------------|----------|
|                       | 1. Case definition adequate | 2. Representativeness cases | 3. Selection controls | 4. Definition controls |                    | 1. Ascertainment of outcome | 2. Measurement | 3. Non-response rate |                            |          |
| Lefevre et al. (2011) | a) *                        | a) *                        | a) *                  | b)-                    | a) *<br>b)-        | c)-                         | b)-            | a) *                 | 5                          | Moderate |
